# Supplementary material
Source: Springer Nature journal article supplement (https://www.springermedizin.de/resource/supplementary/12885_2011_2975_MOESM13_ESM.pdf/9462408)

**Good- vs. Poor-Survival Groups  
Partitioned by Clinicopathologic Parameters**

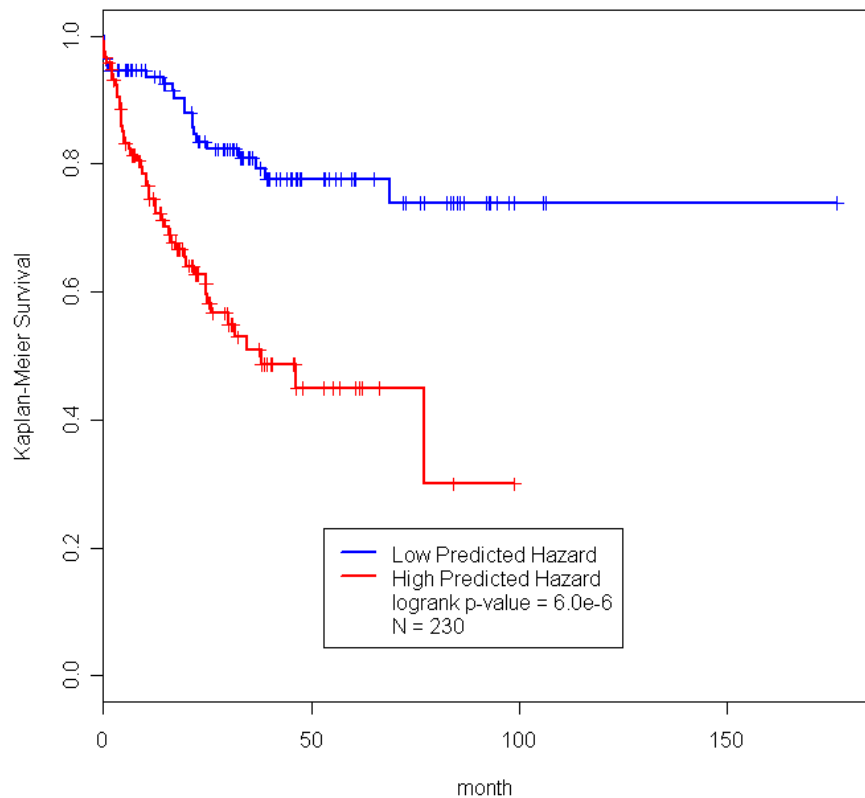

**Good- vs. Poor-DFS Groups  
Partitioned by Clinicopathologic Parameters**

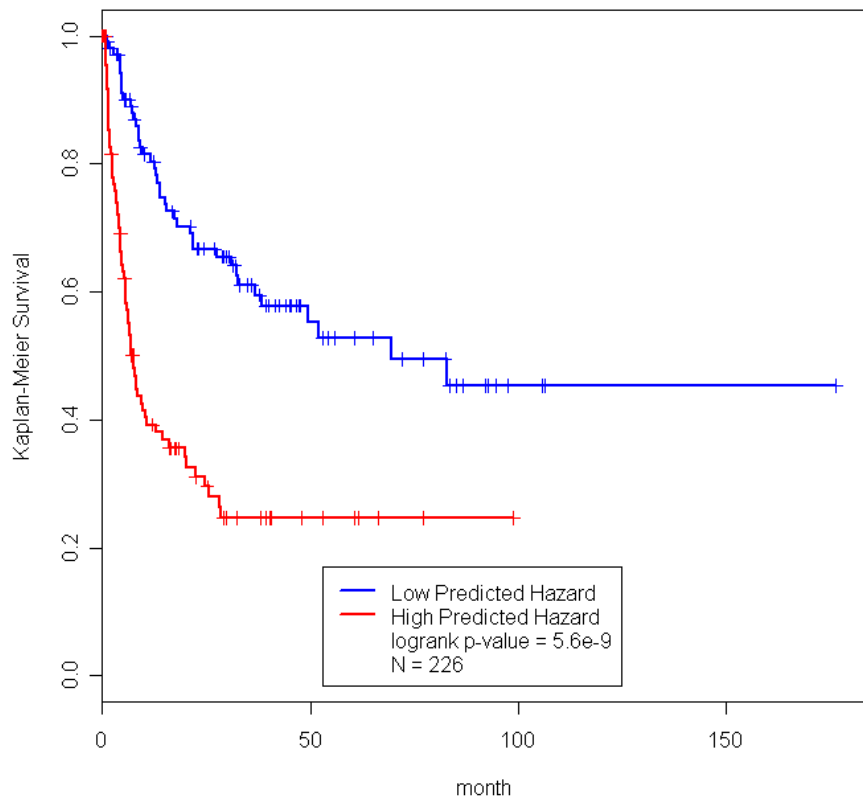

Supplement: MOESM13 [file 9462408]
